# Supplementary material for: Alpha2 Adrenergic Modulation of Spike-Wave Epilepsy: Experimental Study of Pro-Epileptic and Sedative Effects of Dexmedetomidine
Source: MDPI journal article supplement (doi:10.3390/ijms24119445), 2023-05-29

**Supplementary File S3**  
**Individual results of the automatic analysis of SWDs**

**Table S3.1.** Information about rat subjects used in the control and the experimental groups

| Strain                                             | N of subjects | Sex     | Body weight, g | IDs        |
|----------------------------------------------------|---------------|---------|----------------|------------|
| Non-epileptic, control                             |               |         |                |            |
| NEW                                                | 5             | males   | 355-446        | M1, M3-M6  |
|                                                    | 8             | females | 230-253        | F1-F8      |
| Total                                              | 13            |         |                |            |
| Epileptic phenotype (spontaneous SWDs in baseline) |               |         |                |            |
| WAG/Rij                                            | 2             | males   | 356-367        | W11, W12   |
|                                                    | 9             | females | 226-357        | W1-W8, W10 |
| Wistar                                             | 1             | female  | 273-275        | W9         |
| NEW                                                | 1             | male    | 400            | M2         |
| Total                                              | 13            |         |                |            |

\*- Non-epileptic subjects F4 and F5 exhibited the genuine SWDs after Dex injections (the latent form of epilepsy).

**Table S3.2.** Results of cluster analysis of the epileptic group (13 rats)

| Cluster 1     |          | Cluster 2            |          | Cluster 3                             |          | Cluster 4                            |          |
|---------------|----------|----------------------|----------|---------------------------------------|----------|--------------------------------------|----------|
| Low/no effect |          | Pro-epileptic effect |          | Severe absence<br>(Epi-status, early) |          | Severe absence<br>(Epi-status, late) |          |
| ID            | Dex dose | ID                   | Dex dose | ID                                    | Dex dose | ID                                   | Dex dose |
| W1            | 0.049    | W1                   | 0.007    | W3                                    | 0.011    | W6                                   | 0.004    |
| W1            | 0.004    | W2                   | 0.004    | W5                                    | 0.012    | W6                                   | 0.008    |
| W7            | 0.007    | W4                   | 0.008    | W5                                    | 0.007    |                                      |          |
| W7            | 0.011    | W5                   | 0.003    |                                       |          |                                      |          |
| W7            | 0.012    | W7                   | 0.037    |                                       |          |                                      |          |
| W7            | 0.003    | W9                   | 0.011    |                                       |          |                                      |          |
| W8            | 0.008    | W10                  | 0.012    |                                       |          |                                      |          |
| W11           | 0.014    | W6                   | 0.004    |                                       |          |                                      |          |
| W12           | 0.014    | W2                   | 0.008    |                                       |          |                                      |          |
| W3            | 0.003    |                      |          |                                       |          |                                      |          |
| M2            | 0.010    |                      |          |                                       |          |                                      |          |
| Average       |          |                      |          |                                       |          |                                      |          |

The following plots demonstrate density of SWDs after dexmedetomidine injections in different doses and during baseline. Density of SWDs was computed in s with 5 min bin

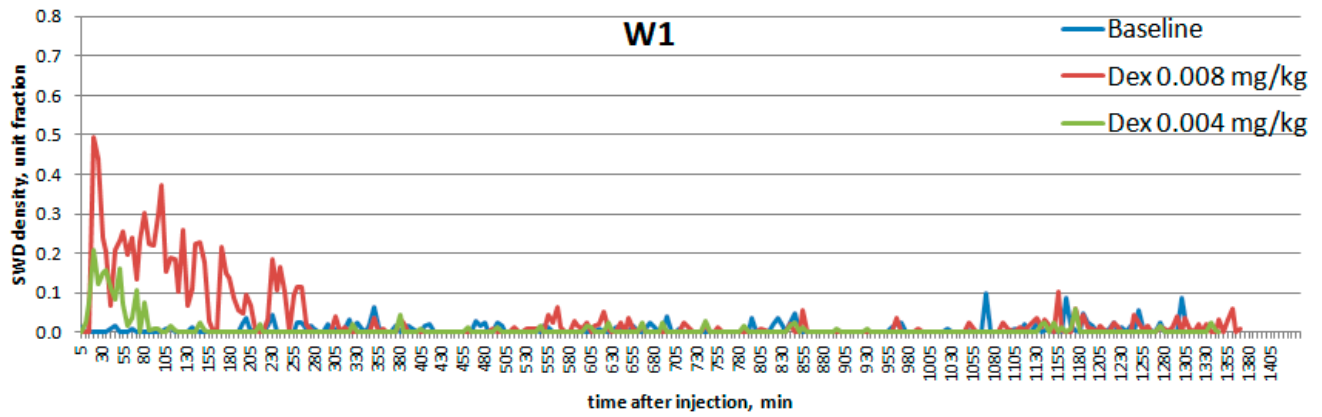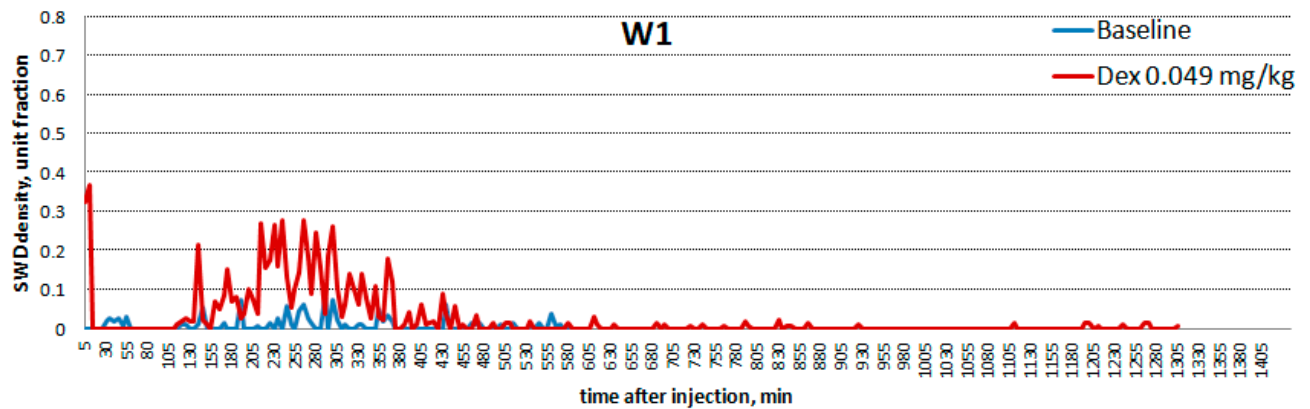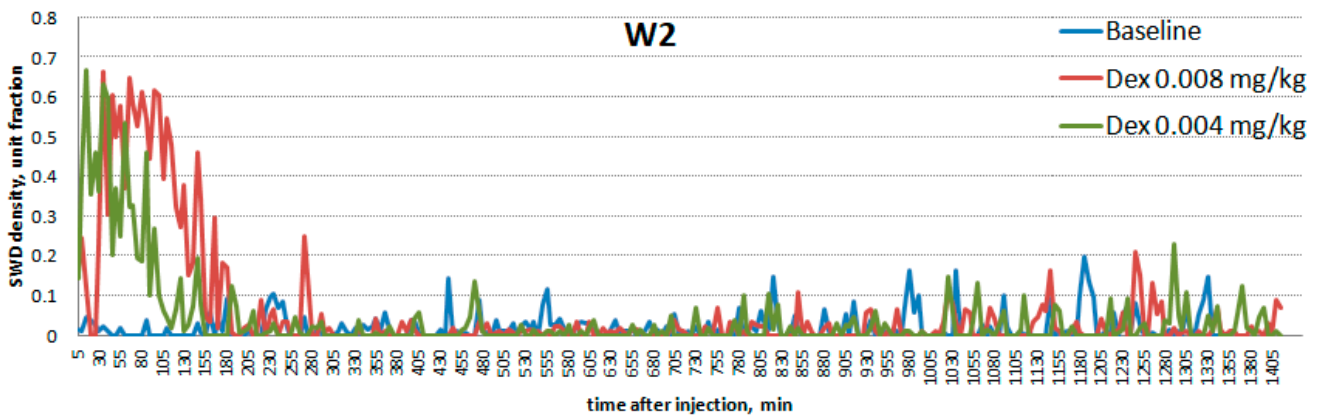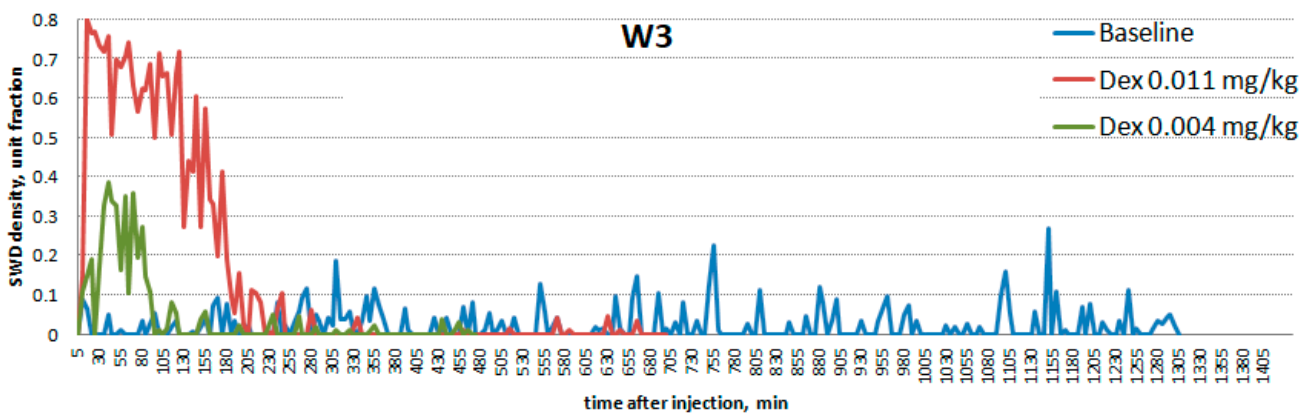

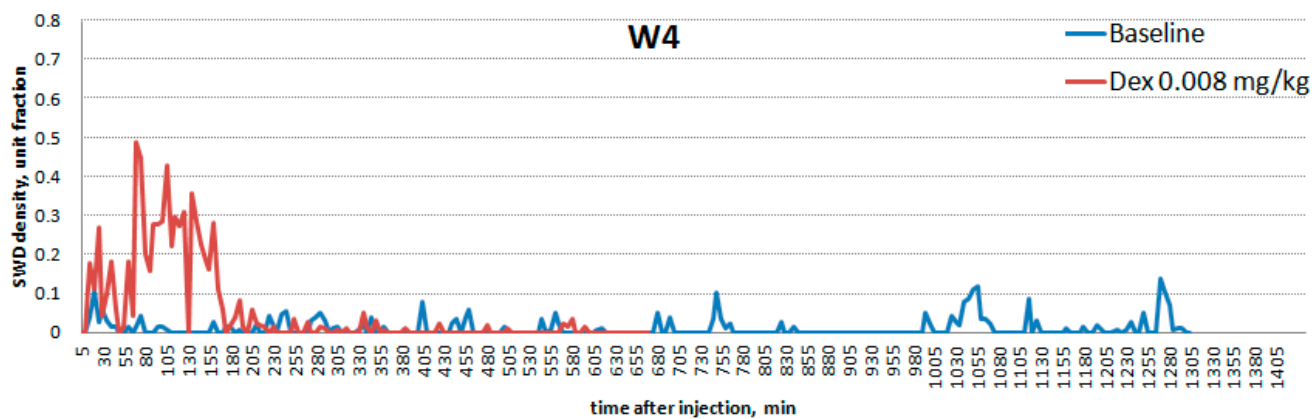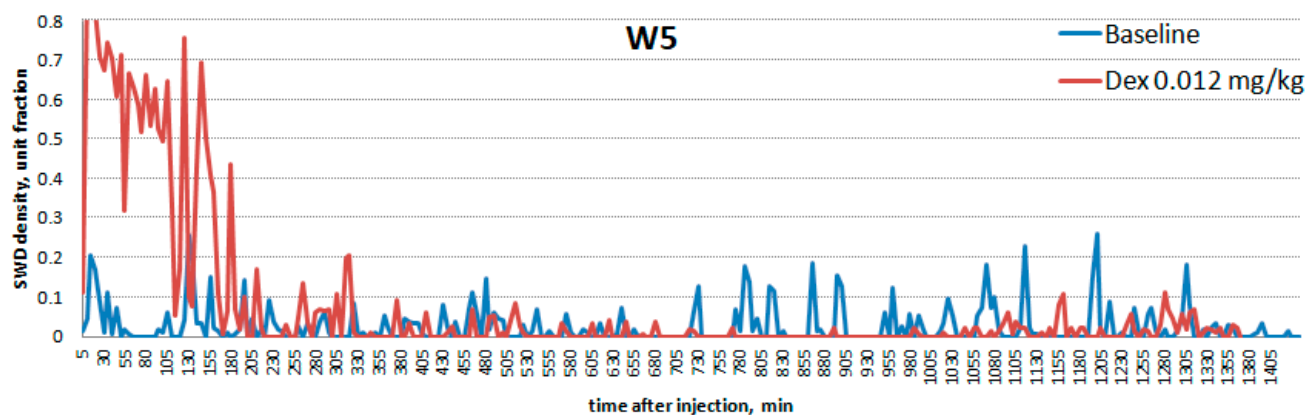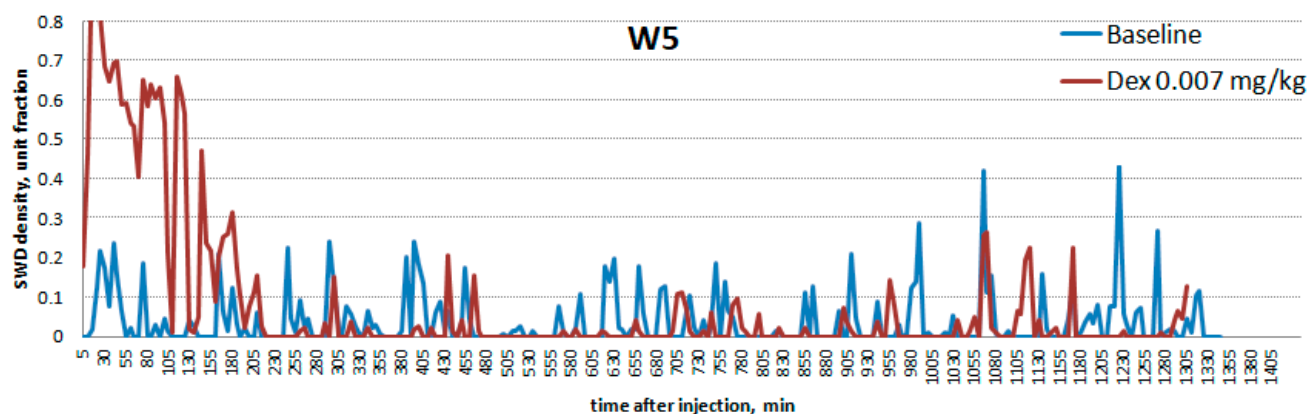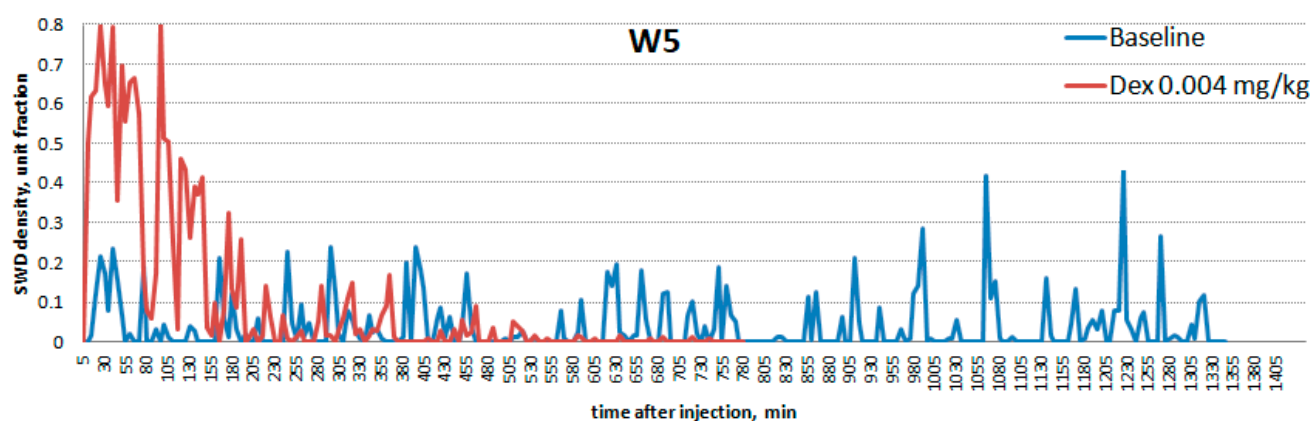

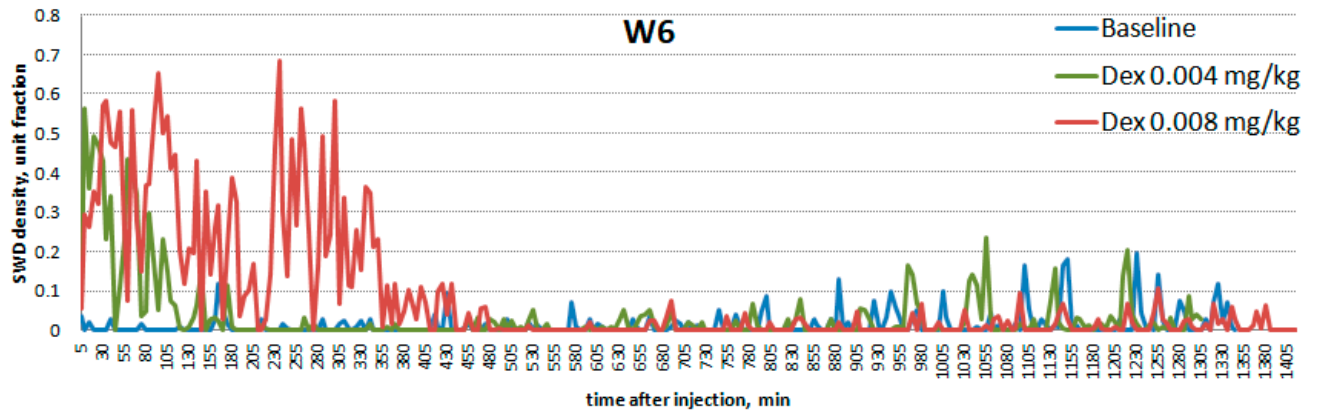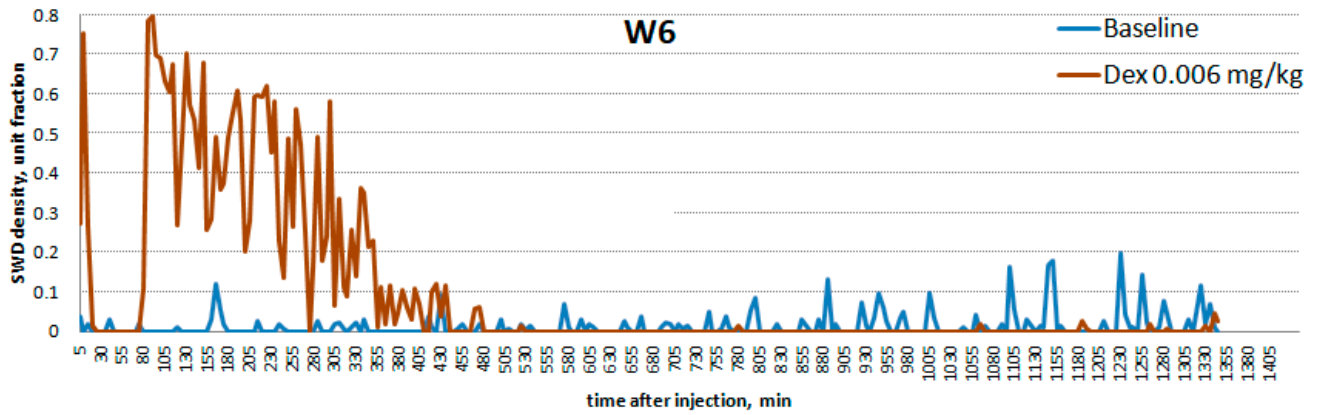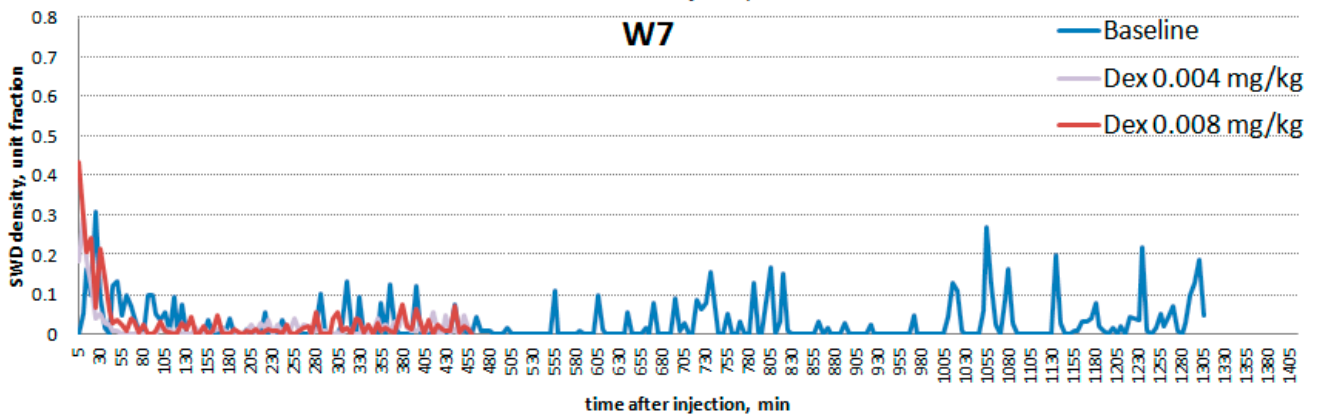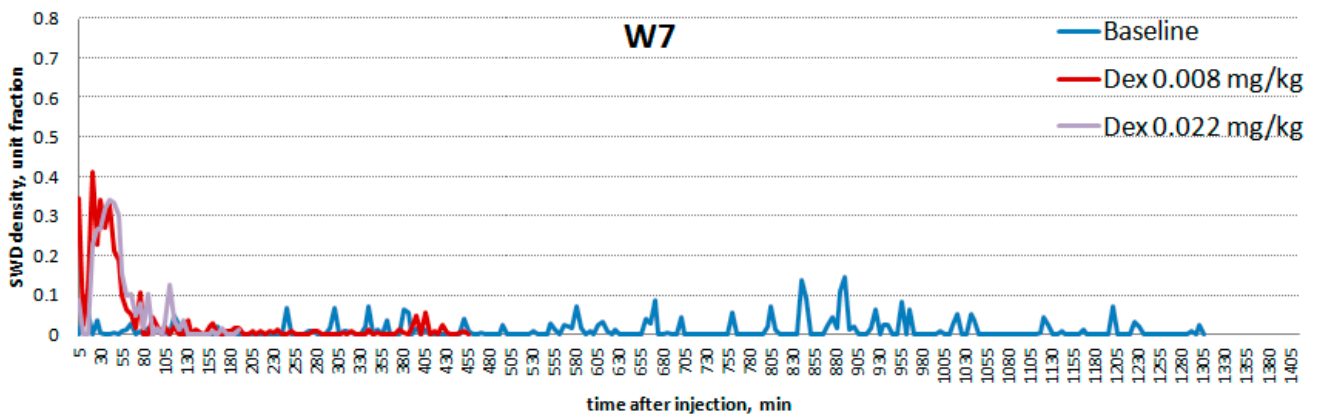

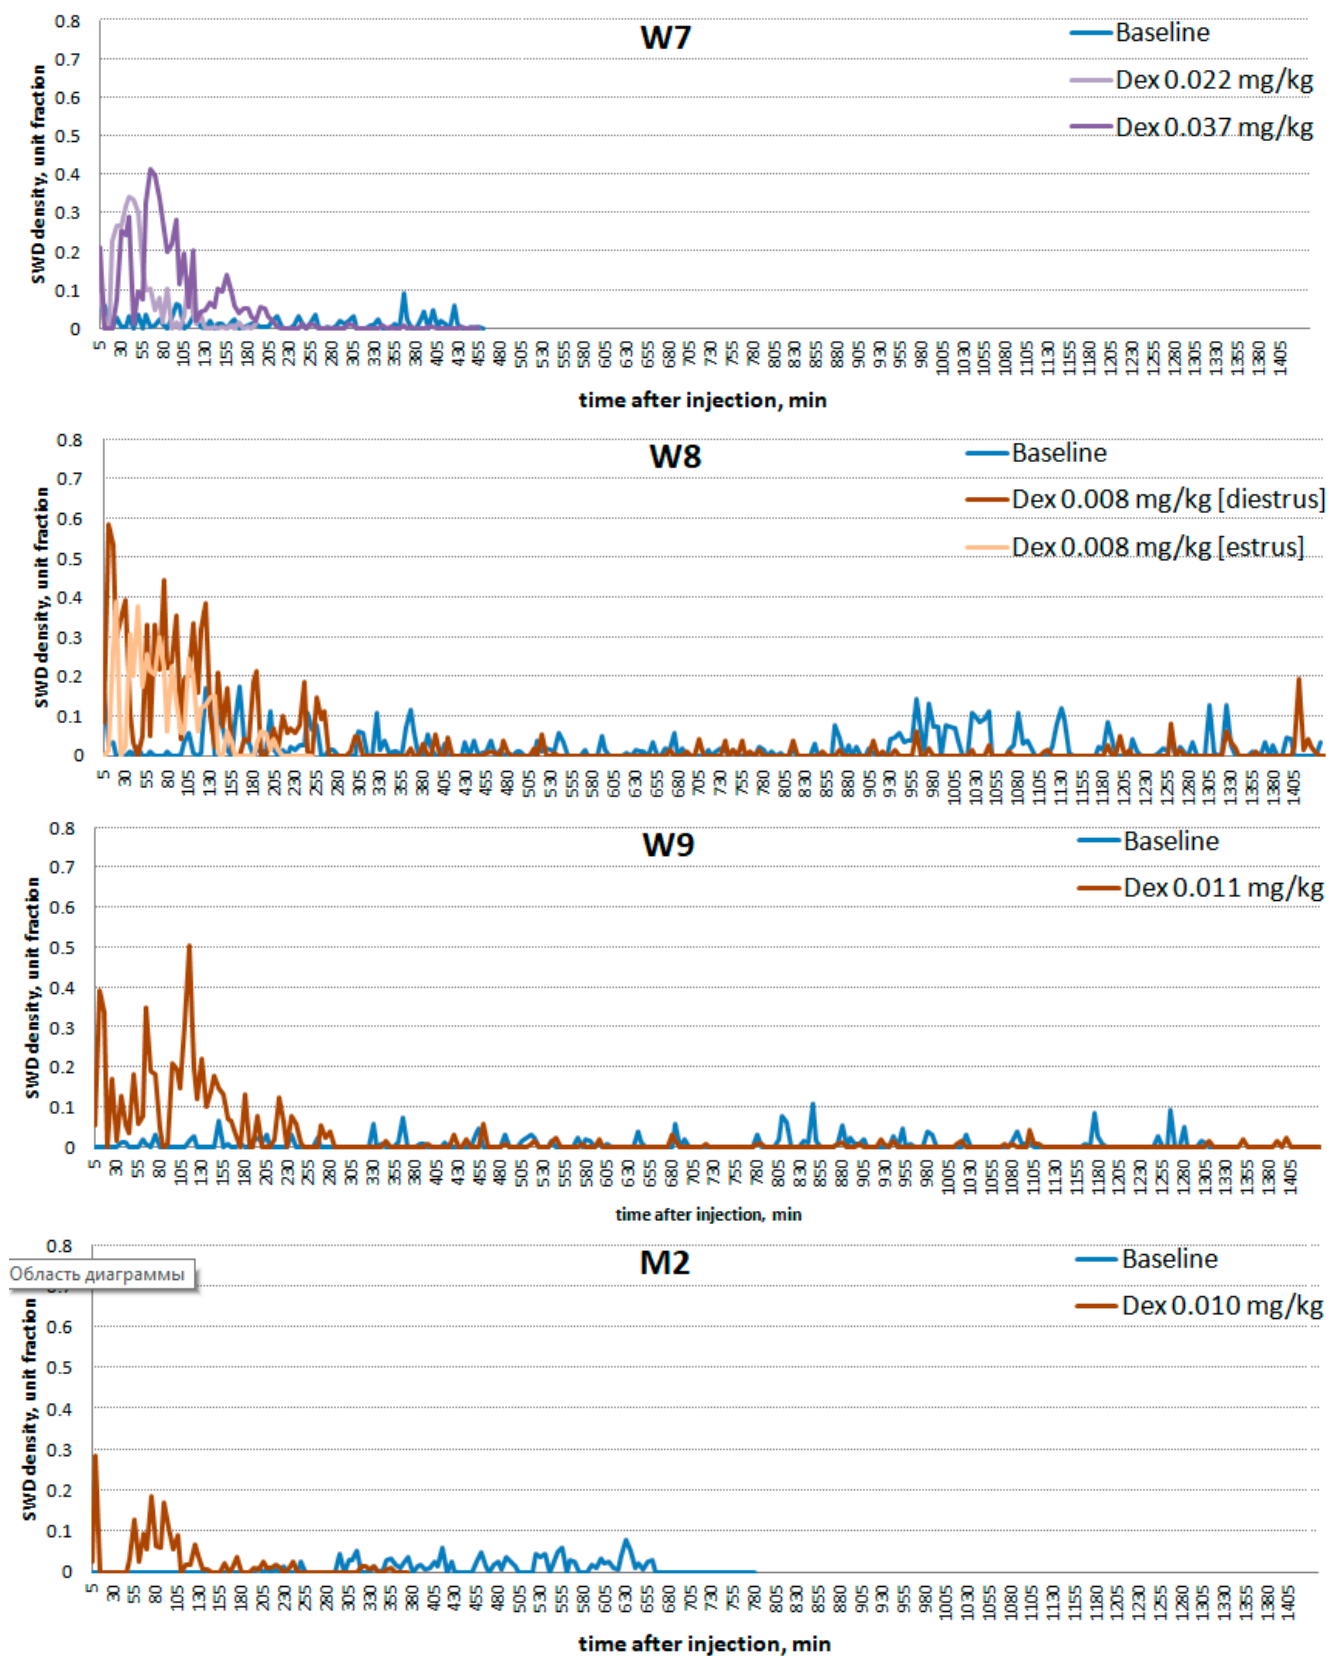

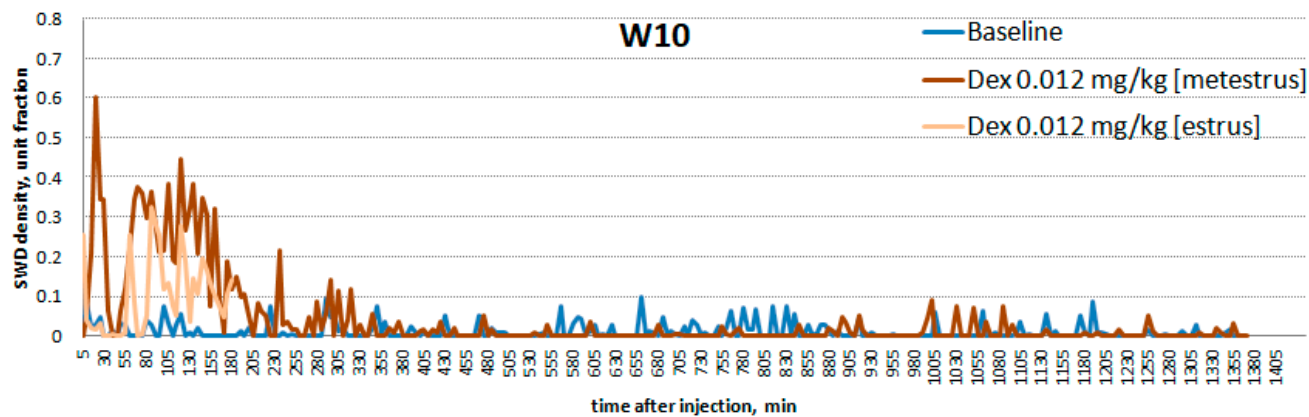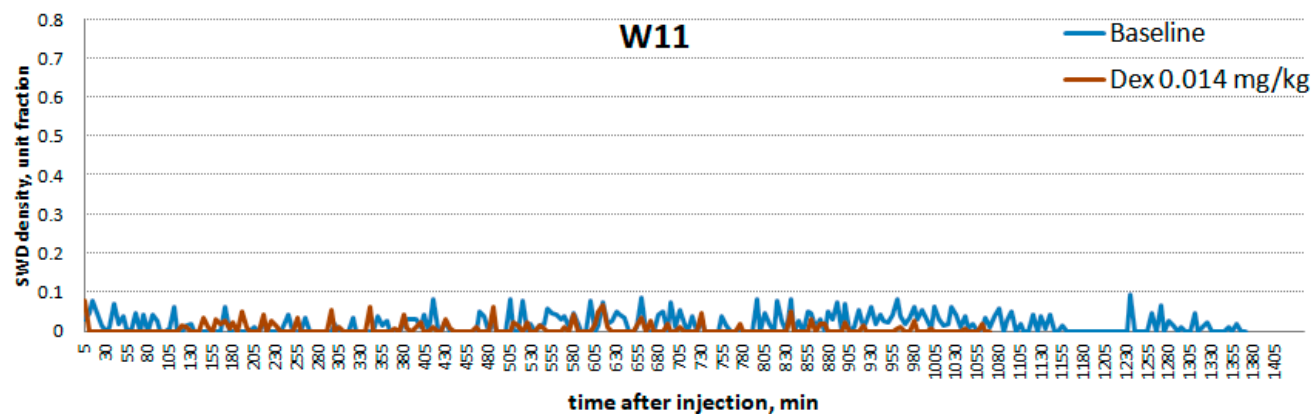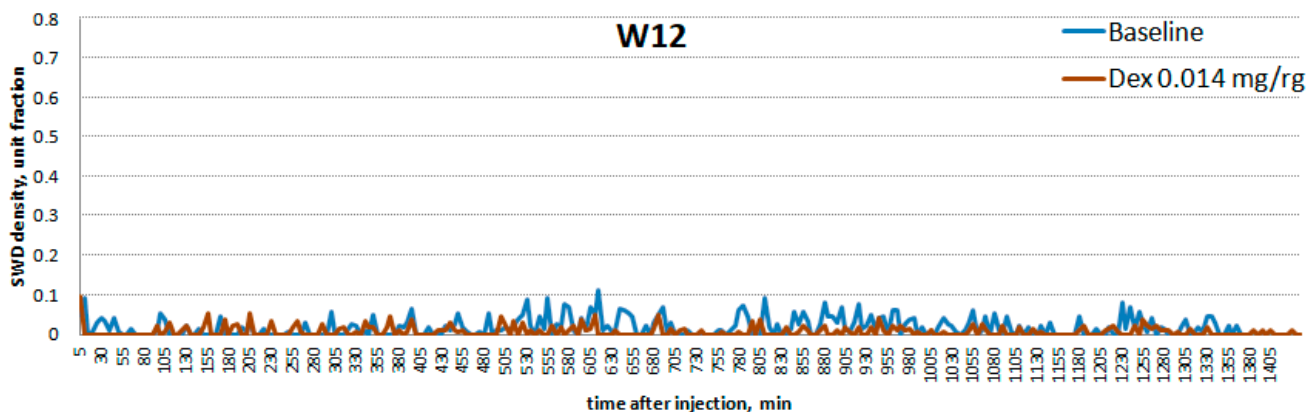

Part 2. Medetomidine injections

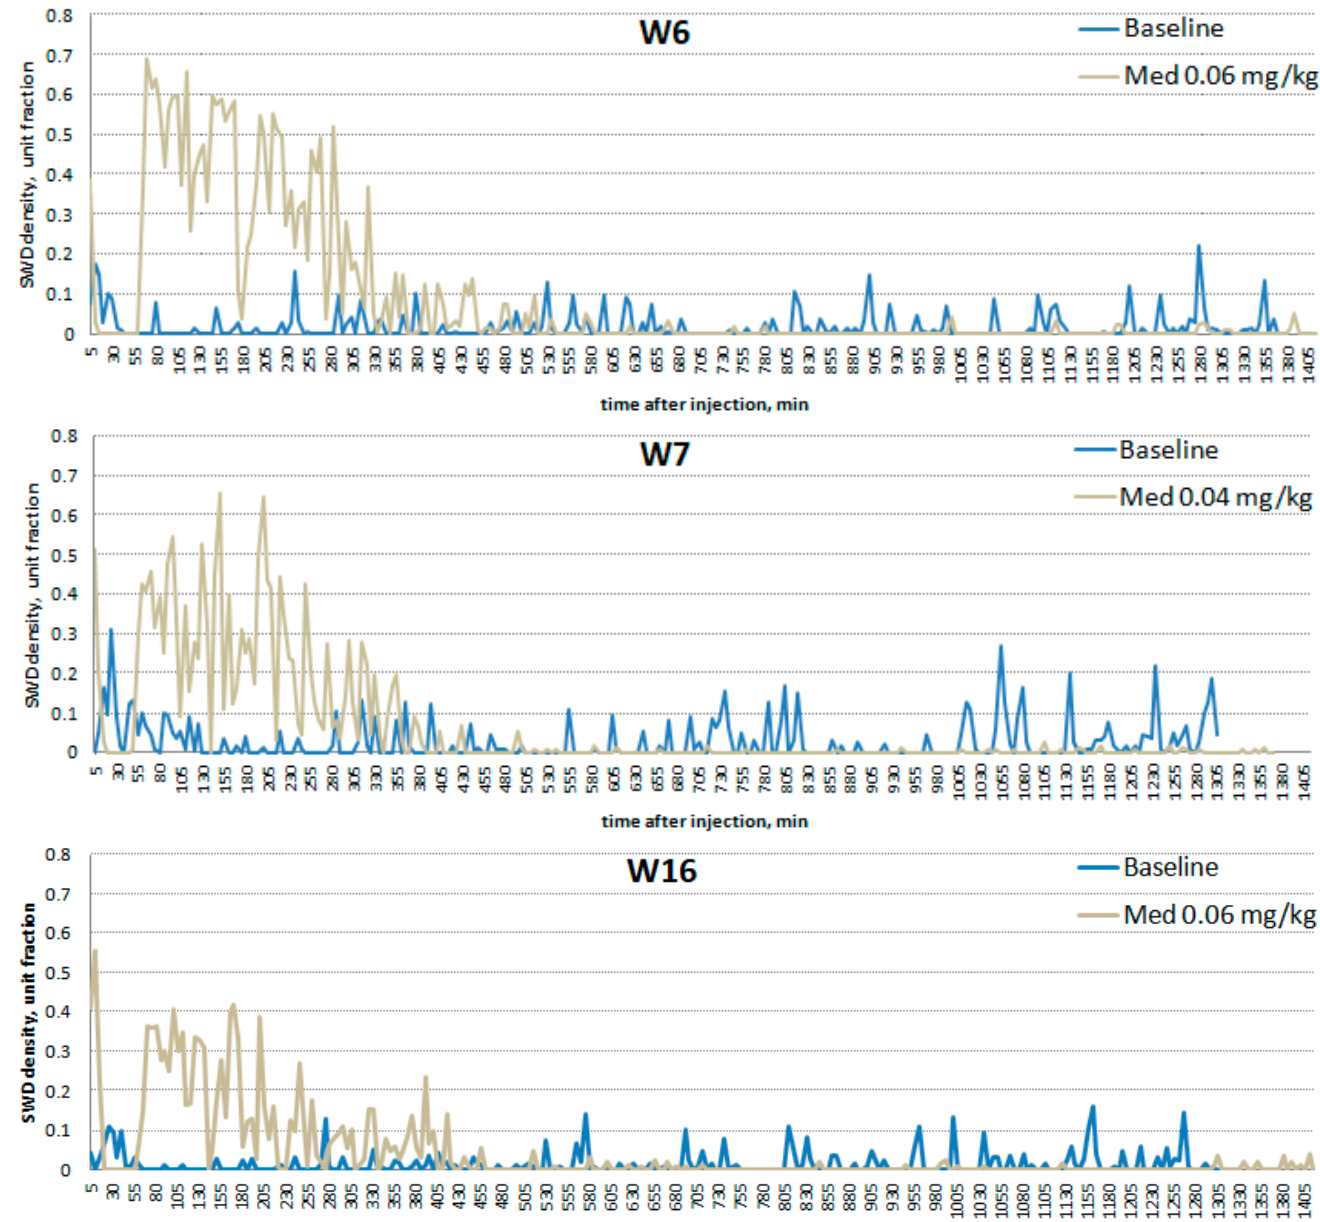



### Part 3. Xylazine injections

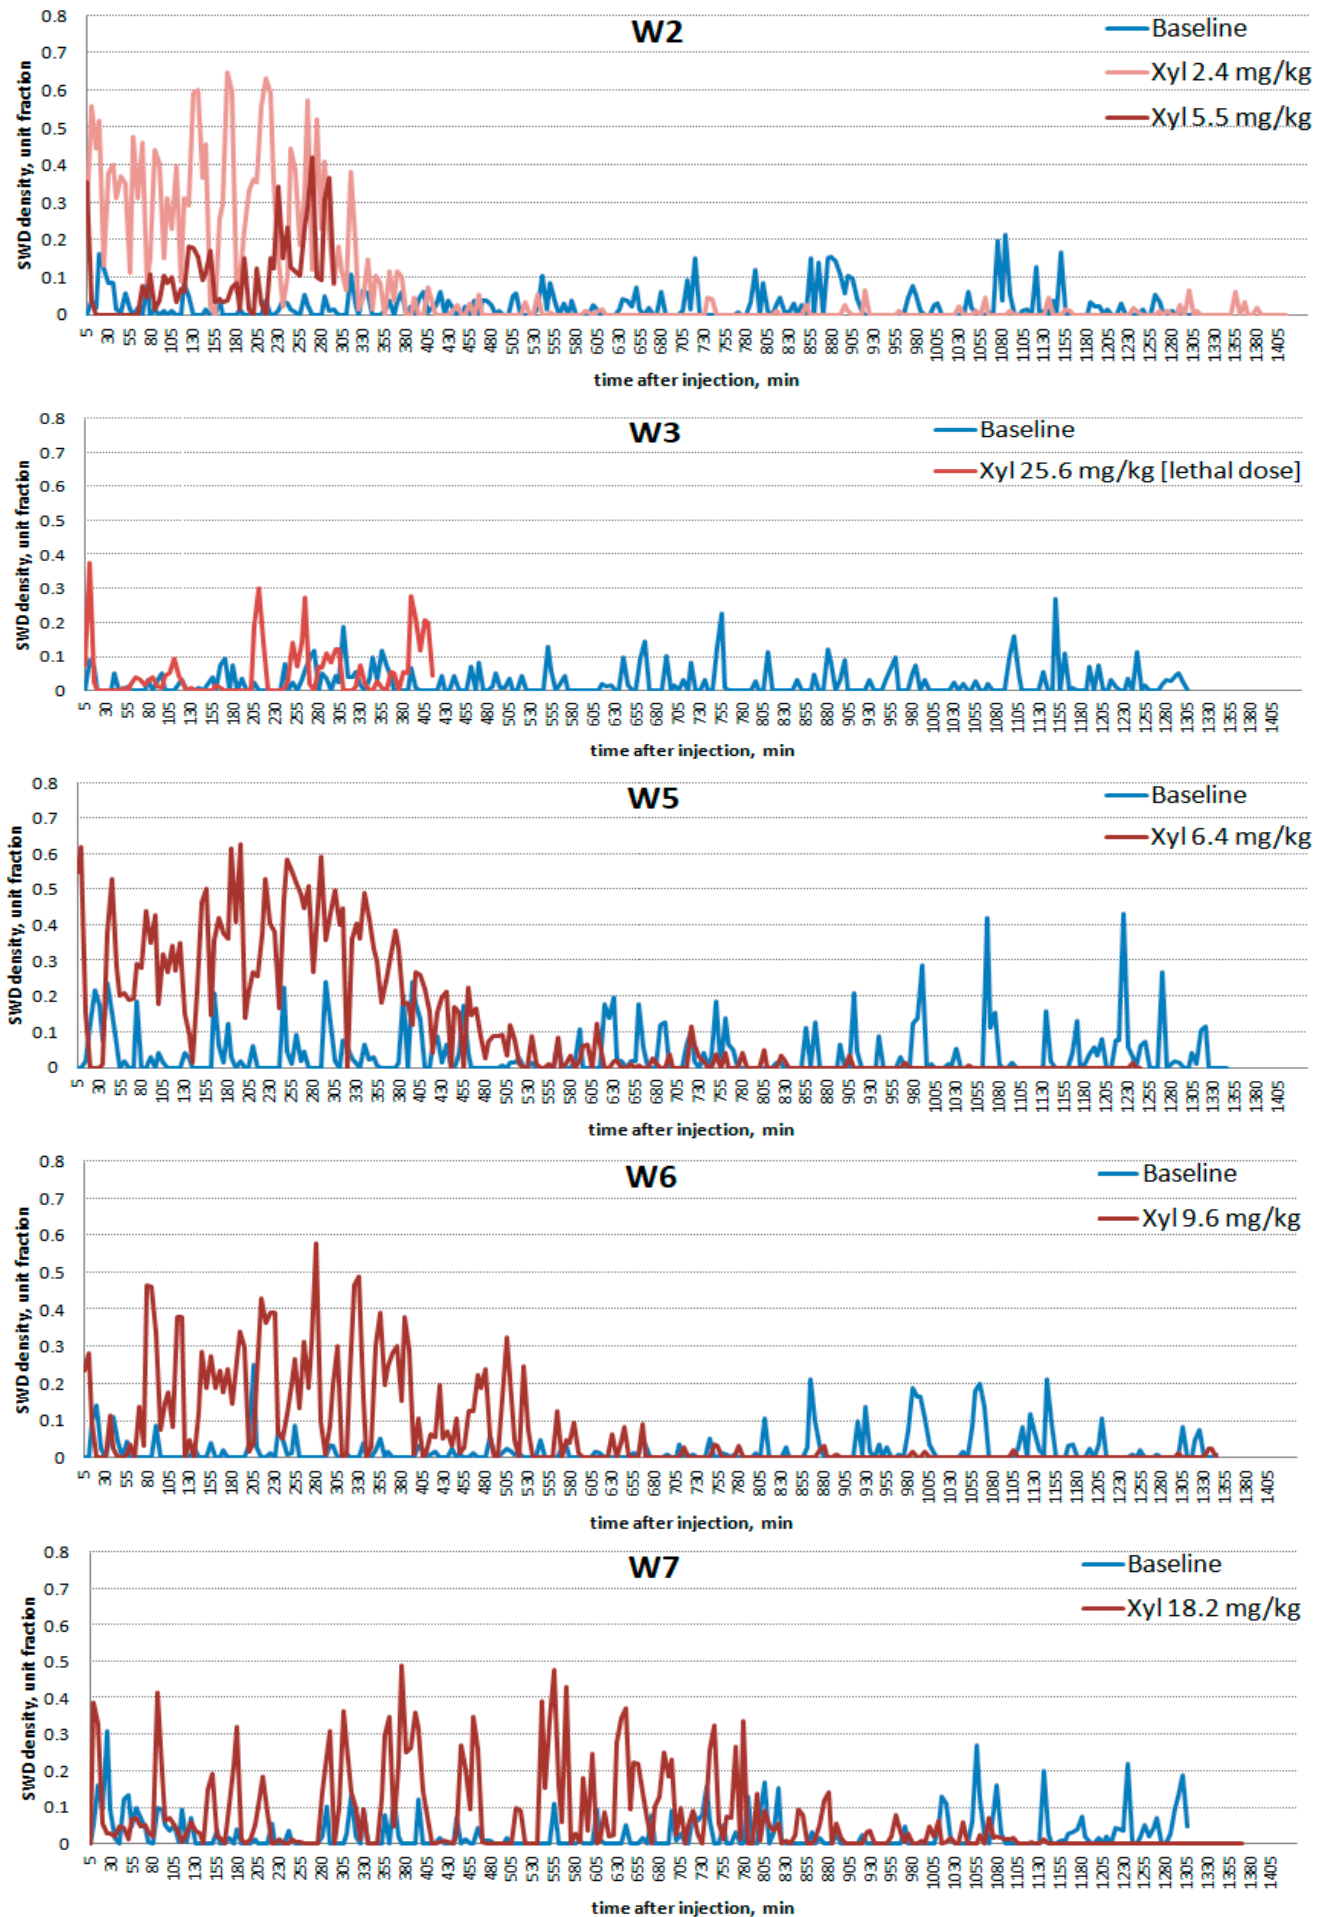



Part 4. Terazazine administration (per os)

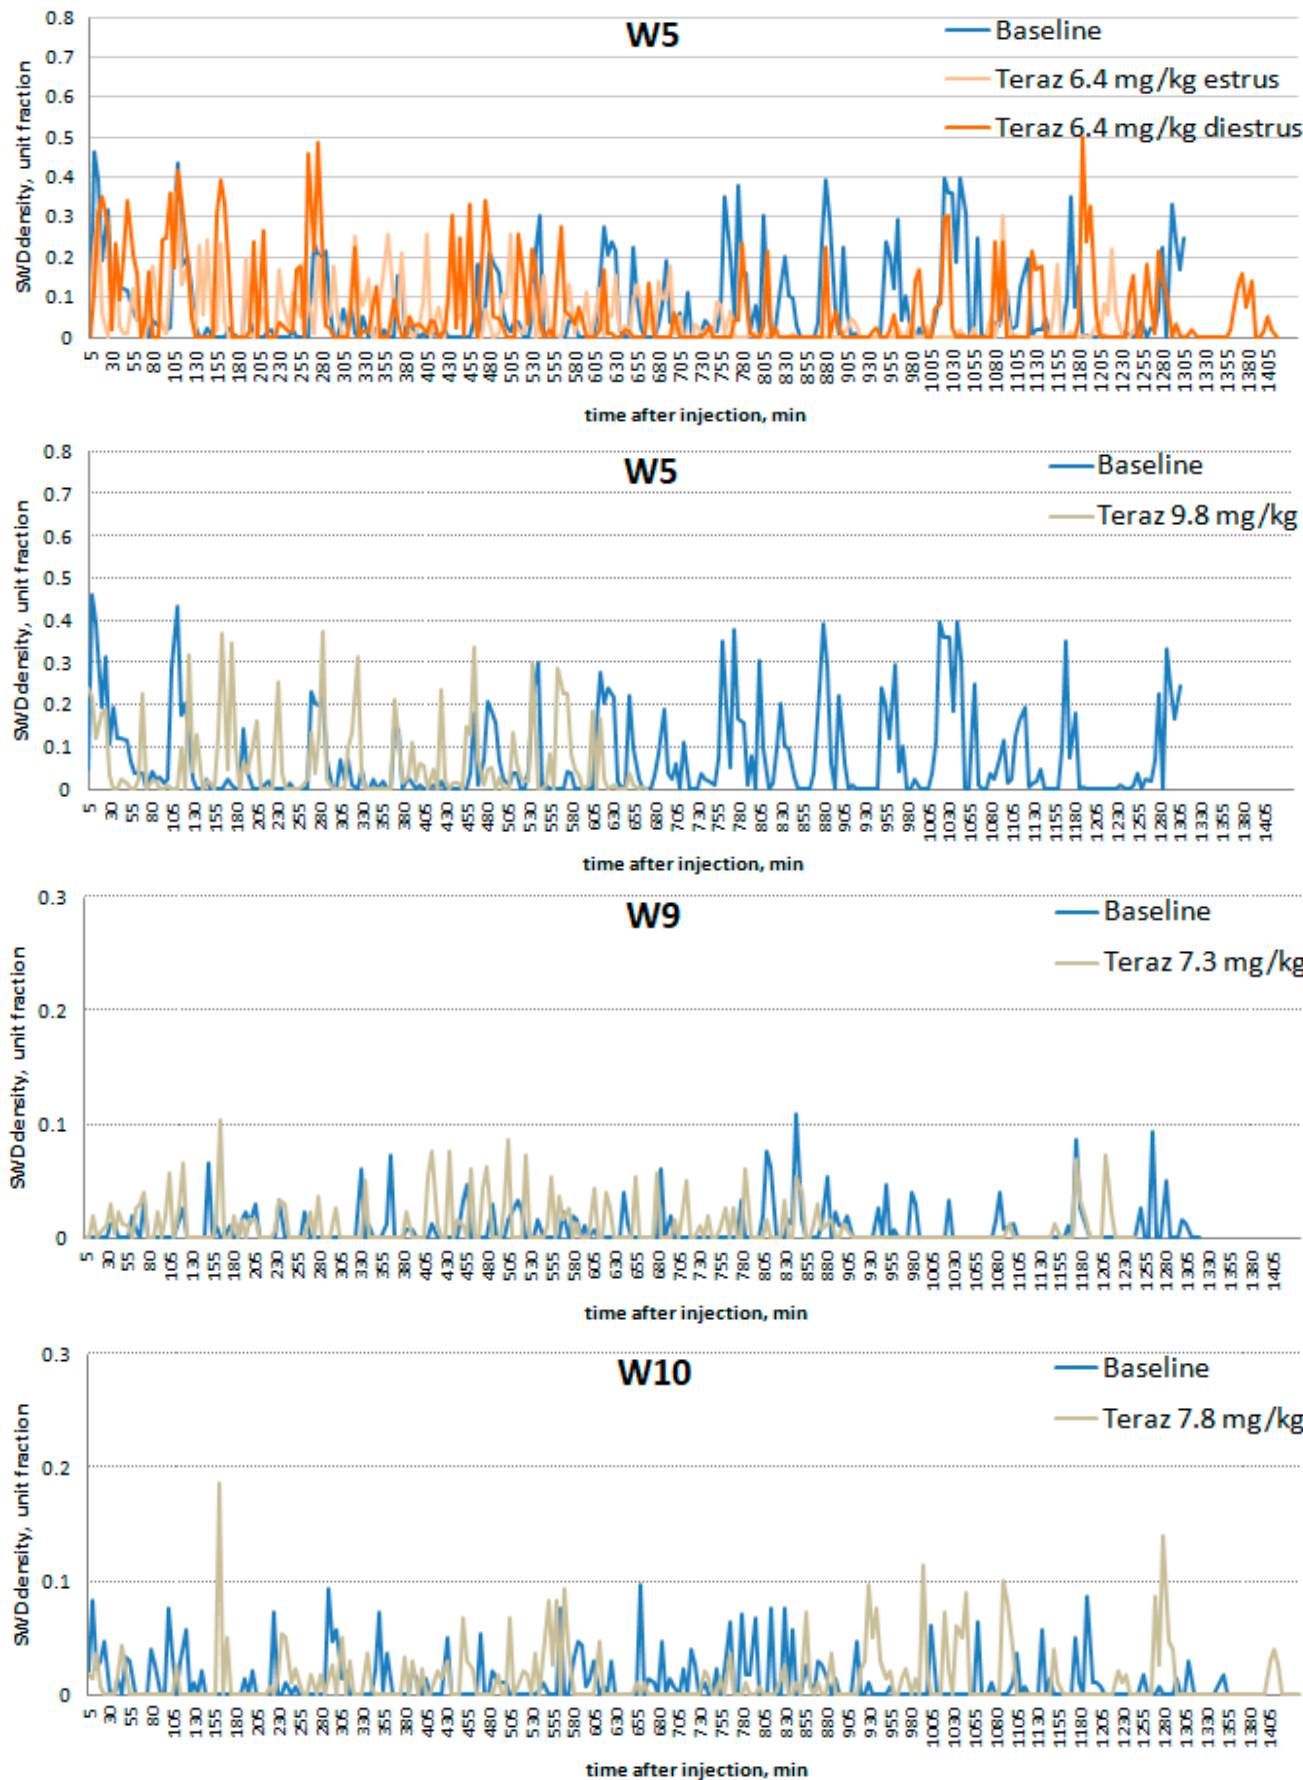

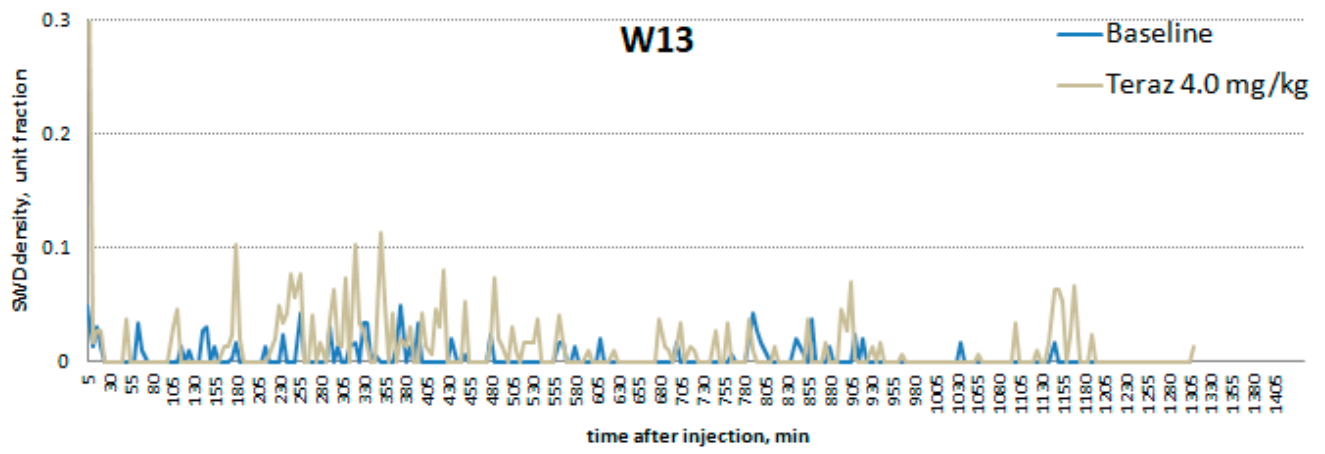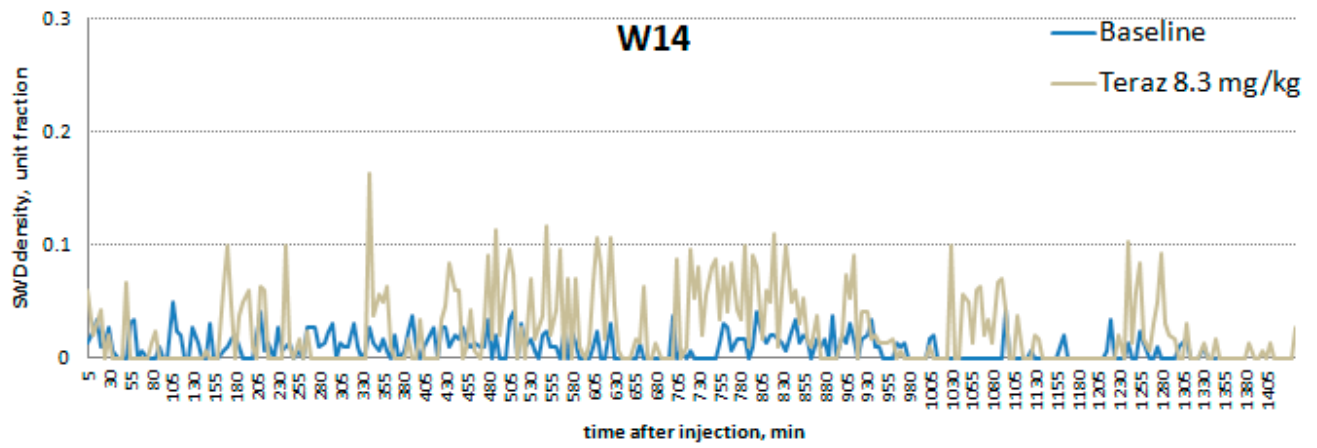

Supplement: s1 [file s1]
