# Supplementary material for: Alpha2 Adrenergic Modulation of Spike-Wave Epilepsy: Experimental Study of Pro-Epileptic and Sedative Effects of Dexmedetomidine
Source: MDPI journal article supplement (doi:10.3390/ijms24119445), 2023-05-29
Supplement: s1 [file s1]

## Supplementary S2

### Spike-wave discharges in the control non-epileptic group (NEW rat substrain)

Spike-wave discharges were common in WAG/Rij subjects, but they were almost completely absent in non-epileptic control subjects (NEW). The male subject M2 displayed 13 SWD per hour in average (Table S2.1) showing epileptic phenotype. This subject was moved from the control non-epileptic to the epileptic group.

**Table S2.1.** Results of automatic detection of spike-wave discharges in non-epileptic control subjects (NEW) during baseline

|         | Rats and recordings |               |                   |             |                | SWDs                 |                      |                          |                   |                      |
|---------|---------------------|---------------|-------------------|-------------|----------------|----------------------|----------------------|--------------------------|-------------------|----------------------|
|         | ID                  | Date of birth | Date of recording | AGE, months | Phase of cycle | Length of recogn., h | Total SWD's duration | SWD's density s/per hour | Mean SWD duration | Total number of SWDs |
| males   | M1                  | 19.12.2021    | 25.05.2022        | 5.2         |                | 19.56                | 2.3                  | 0.12                     | 2.3               | 1                    |
|         | M2*                 | 19.12.2021    | 18.07.2022        | 7           |                | 11.11                | 428.1                | 38.53                    | 2.93              | 146                  |
|         | M3                  | 19.12.2021    | 11.08.2022        | 7.8         |                | 15.26                | 5.17                 | 0.34                     | 2.59              | 2                    |
|         | M4                  | 19.11.2021    | 11.08.2022        | 8.8         |                | 24.85                | 2.8                  | 0.11                     | 2.8               | 1                    |
|         | M5                  | 19.11.2021    | 31.08.2022        | 9.5         |                | 20.72                | 0                    | 0                        | -                 | 0                    |
|         | M6                  | 19.11.2021    | 31.10.2022        | 11.5        |                | 21.72                | 0                    | 0                        | -                 | 0                    |
| females | F1                  | 19.11.2021    | 18.07.2022        | 8           |                | 11.11                | 3.6                  | 0.32                     | 3.6               | 1                    |
|         | F2                  | 19.11.2021    | 09.08.2022        | 8.8         | proestrus      | 20.11                | 2.3                  | 0.11                     | 2.3               | 1                    |
|         | F3                  | 19.12.2021    | 17.08.2022        | 8           |                | 21.72                | 4.5                  | 0.21                     | 2.25              | 2                    |
|         | F4                  | 19.12.2021    | 31.08.2022        | 8.5         | diestrus       | 20.72                | 13                   | 0.63                     | 2.6               | 5                    |
|         | F5#                 | 19.11.2021    | 15.08.2022        | 9           | diestrus       | 21.72                | 0                    | 0                        | -                 | 0                    |
|         | F6#                 | 13.11.2021    | 09.08.2022        | 9           | proestrus      | 20.11                | 0                    | 0                        | -                 | 0                    |
|         | F7                  | 13.11.2021    | 15.08.2022        | 9.2         | proestrus      | 21.72                | 6.5                  | 0.3                      | 3.25              | 2                    |
|         | F8                  | 13.11.2021    | 17.08.2022        | 9.2         |                | 21.72                | 0                    | 0                        | -                 | 0                    |
|         | F8                  | 13.11.2021    | 31.10.2022        | 11.7        |                | 21.72                | 3.4                  | 0.16                     | 3.4               | 1                    |

\* - Subject M2 was excluded from analysis, because it has an epileptic phenotype

# - Subjects F5 and F6 had non-epileptic phenotype in baseline and showed SWDs after i.p. injection of Dexmedetomidine

Dexmedetomidine (Dex) in doses ranging from 0.004 to 0.034 mg/kg was intraperitoneally injected in NEW rats (Figure S2.1).

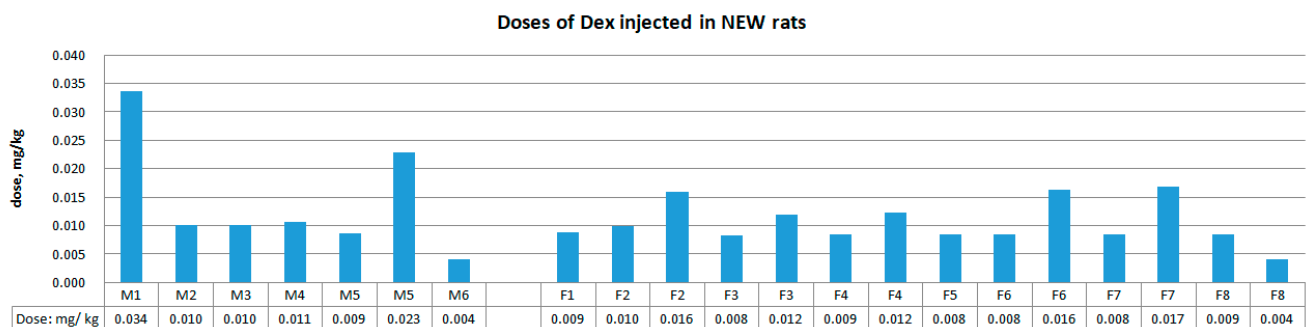

**Figure S2.1.** Doses of Dexmedetomidine (Dex) injected in the group of NEW rats.

Two female subjects (F5 and F6) with the non-epileptic phenotype determined in baseline (Table S1) showed SWDs after administration of Dexmedetomidine in dose 0.008 mg/kg (both subjects). In the rest 11 control NEW rats, Dexmedetomidine did not provoke genuine SWDs. The results of the automatic SWDs detection are shown in Table S2.2.

**Table S2.2.** Results of automatic detection of spike-wave discharges in non-epileptic control subjects (NEW) after i.p. administration of Dexmedetomidine.

|         | Rats and recordings |                      |                |                   | Dex.<br>dose,<br>mg/kg | SWDs                    |                         |                              |                         |      |
|---------|---------------------|----------------------|----------------|-------------------|------------------------|-------------------------|-------------------------|------------------------------|-------------------------|------|
|         | ID                  | Date of<br>recording | AGE,<br>months | Phase of<br>cycle |                        | Length of<br>recogn., h | Length of<br>recogn., h | SWD<br>density<br>s/per hour | Mean<br>SWD<br>duration | nSWD |
| males   | M1                  | 26.05.2022           | 5.3            |                   | 0.034                  | 10.66                   | 0                       | 0                            | -                       | 0    |
|         | M2                  | 19.07.2022           | 7.1            |                   | 0.010                  | 6.22                    | 536                     | 86.14                        | 3.01                    | 178  |
|         | M3                  | 12.08.2022           | 7.9            |                   | 0.010                  | 20.72                   | 2.8                     | 0.1                          | 2.08                    | 1    |
|         | M4                  | 12.08.2022           | 8.9            |                   | 0.011                  | 20.72                   | 0                       | 0                            | -                       | 0    |
|         | M5                  | 01.09.2022           | 9.5            |                   | 0.009                  | 23.56                   | 2.2                     | 0.09                         | 2.2                     | 1    |
|         | M5                  | 14.09.2022           | 10             |                   | 0.023                  | 21.72                   | 0                       | 0                            | -                       | 0    |
|         | M6                  | 01.11.2022           | 11.5           |                   | 0.004                  | 23.56                   | 4.9                     | 0.21                         | 2.45                    | 2    |
| females | F1                  | 19.07.2022           | 8.1            |                   | 0.009                  | 6.22                    | 0                       | 0                            | -                       | 0    |
|         | F2                  | 10.08.2022           | 8.8            | proestrus         | 0.010                  | 22.22                   | 15                      | 0.68                         | 2.5                     | 6    |
|         | F2                  | 12.09.2022           | 9.9            | diestrus          | 0.016                  | 22.78                   | 0                       | 0                            | -                       | 0    |
|         | F3                  | 18.08.2022           | 8.1            |                   | 0.008                  | 22.78                   | 0                       | 0                            | -                       | 0    |
|         | F3                  | 13.09.2022           | 8.9            | proestrus         | 0.012                  | 23.56                   | 0                       | 0                            | -                       | 0    |
|         | F4                  | 01.09.2022           | 8.5            | proestrus         | 0.009                  | 23.56                   | 3.5                     | 0.15                         | 3.5                     | 1    |
|         | F4                  | 13.09.2022           | 8.9            | diestrus          | 0.012                  | 23.56                   | 0                       | 0                            | -                       | 0    |
|         | F5                  | 16.08.2022           | 9              | proestrus         | 0.008                  | 21.72                   | 430                     | 19.8                         | 6.14                    | 70   |
|         | F6                  | 10.08.2022           | 9              | diestrus          | 0.008                  | 22.22                   | 42.8                    | 1.93                         | 2.38                    | 18   |
|         | F6                  | 12.09.2022           | 9.9            | diestrus          | 0.016                  |                         |                         |                              |                         |      |
|         | F7                  | 16.08.2022           | 9.2            | proestrus         | 0.008                  | 22.39                   | 0                       | 0                            | -                       | 0    |
|         | F7                  | 14.09.2022           | 10.2           | proestrus         | 0.017                  | 21.72                   | 9.0                     |                              |                         | 3    |
|         | F8                  | 18.08.2022           | 9.3            |                   | 0.004                  | 23.56                   | 0                       | 0                            | -                       | 0    |
|         | F8                  | 01.11.2022           | 11.7           |                   | 0.009                  | 22.78                   | 12.5                    | 0.55                         | 2.5                     | 5    |

In non-epileptic subjects, i.p. injections of Dex in low doses (0.004-0.034 mg/kg) did not provoke genuine SWDs. Figure S2.2a demonstrates that the power at the central frequency of 8-10 Hz was not high enough to reach the threshold level, therefore, no genuine SWDs were detected. However, injections of Dex elicited epileptiform activity in the form of irregular spikes, 4-8 Hz sharp waves and occasional spike-wave complexes (Figure S2.2b,c). This epileptiform activity did not meet the criteria for SWDs. Four-8 Hz oscillations were defined as the rudimentary SWDs in the frequency band of 4-8 Hz (rudSWDs, Figure S2.2c).

## Genuine SWDs

## Baseline

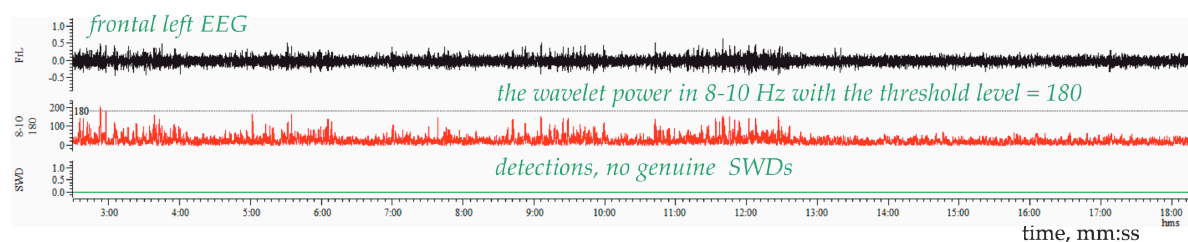

(a)

## Dexmedetomidine (i.p. 0.010 mg/kg)

## Genuine SWDs

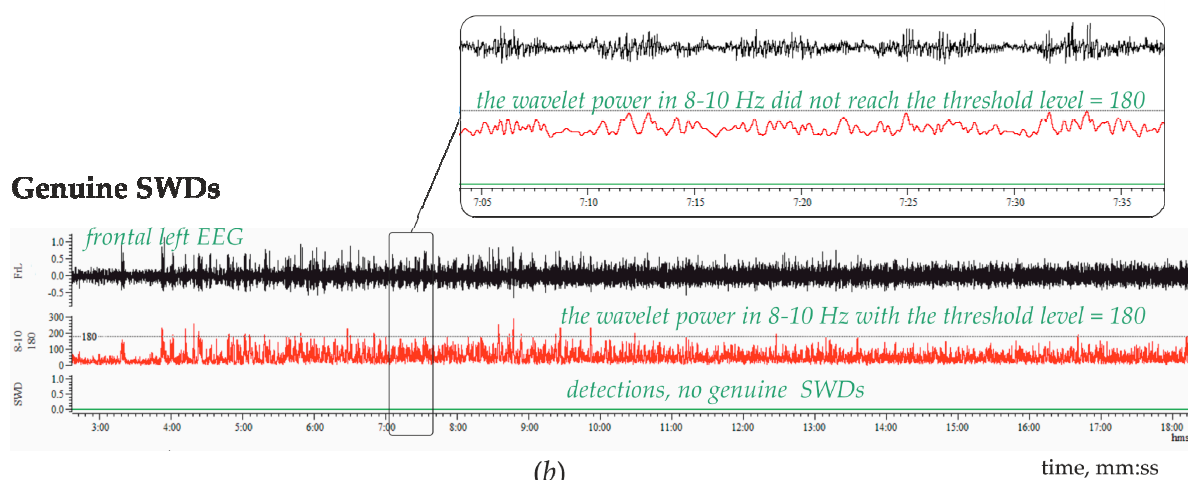

(b)

## Dexmedetomidine (i.p. 0.010 mg/kg)

## Rudimentary SWDs

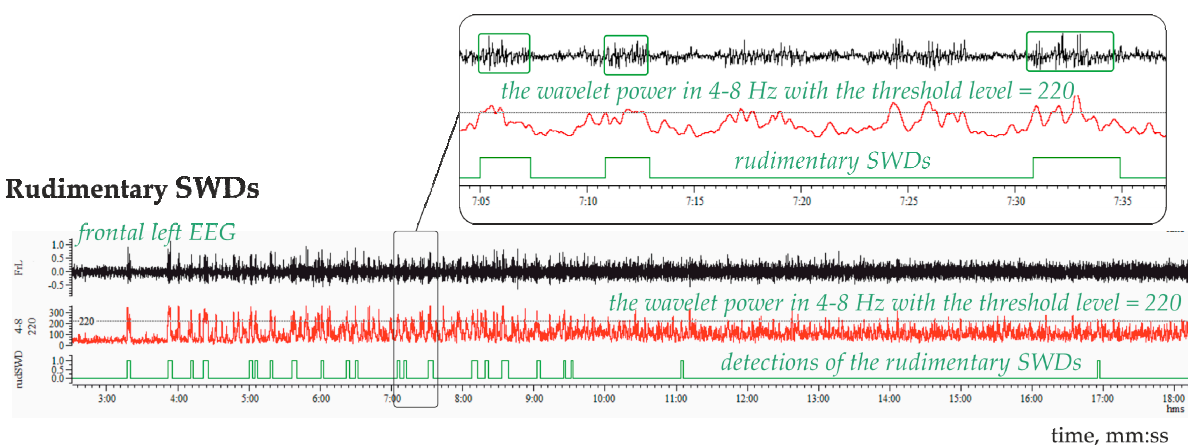

(c)

**Figure S2.2.** Results of SWDs detection in non-epileptic rat. Raw EEGs are shown in black; wavelet power in red; SWD detections (binary responses) as green lines. (a) In baseline, wavelet power at 8-10 Hz did not reach the threshold level, therefore no genuine SWDs. (b) After injection of Dex, wavelet power at 8-10 Hz did not reach the threshold level, and genuine SWDs were not detected. (c) After the injection of Dex, the rudimentary SWDs were detected based on the elevation of the wavelet power at 4-8 Hz, which is a lower frequency than in genuine SWDs.
