# Supplementary material for: Alpha2 Adrenergic Modulation of Spike-Wave Epilepsy: Experimental Study of Pro-Epileptic and Sedative Effects of Dexmedetomidine
Source: Int J Mol Sci. 2023 May 29;24(11):9445. doi: 10.3390/ijms24119445 (PMC10254047; doi:10.3390/ijms24119445)
Supplement: Supplementary file 1 [file ijms-24-09445-s001.zip]

Archive with 4 entries (4 files):
- Supplementary File S1 - SWD detection.pdf
- Supplementary File S2 - non-epileptics.pdf
- Supplementary File S3 - epileptics.pdf
- Supplementary File S4 - states.pdf
